# Supplementary material for: High temperature molecular motions within a model protomembrane architecture
Source: Royal Society of Chemistry journal article supplement (doi:10.1039/d2cp01205g), 2022-01-01
Supplement: d2cp01205g1.pdf [file d2cp01205g1.pdf]

## Electronic supplementary information

### High temperature molecular motions within a model protomembrane architecture

Loreto Misuraca<sup>a,b</sup>, Tatsuhito Matsuo<sup>a,b,c</sup>, Aline Cisse<sup>a,b</sup>, Josephine LoRicco<sup>d</sup>, Antonio Caliò<sup>d</sup>, Jean-Marc Zanotti<sup>b</sup>, Bruno Demé<sup>b</sup>, Philippe Oger<sup>d,\*</sup> and Judith Peters<sup>c,d,e\*</sup>

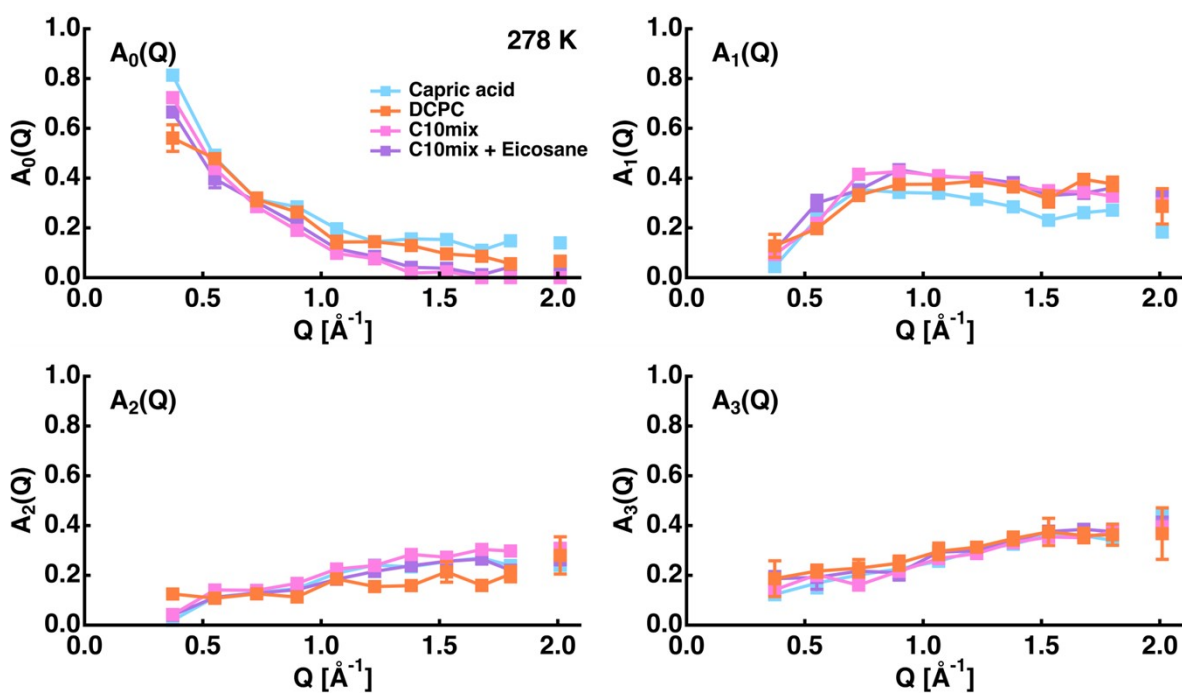

Figure S1: Amplitudes  $A_0$  to  $A_3$  of all samples at 278 K.

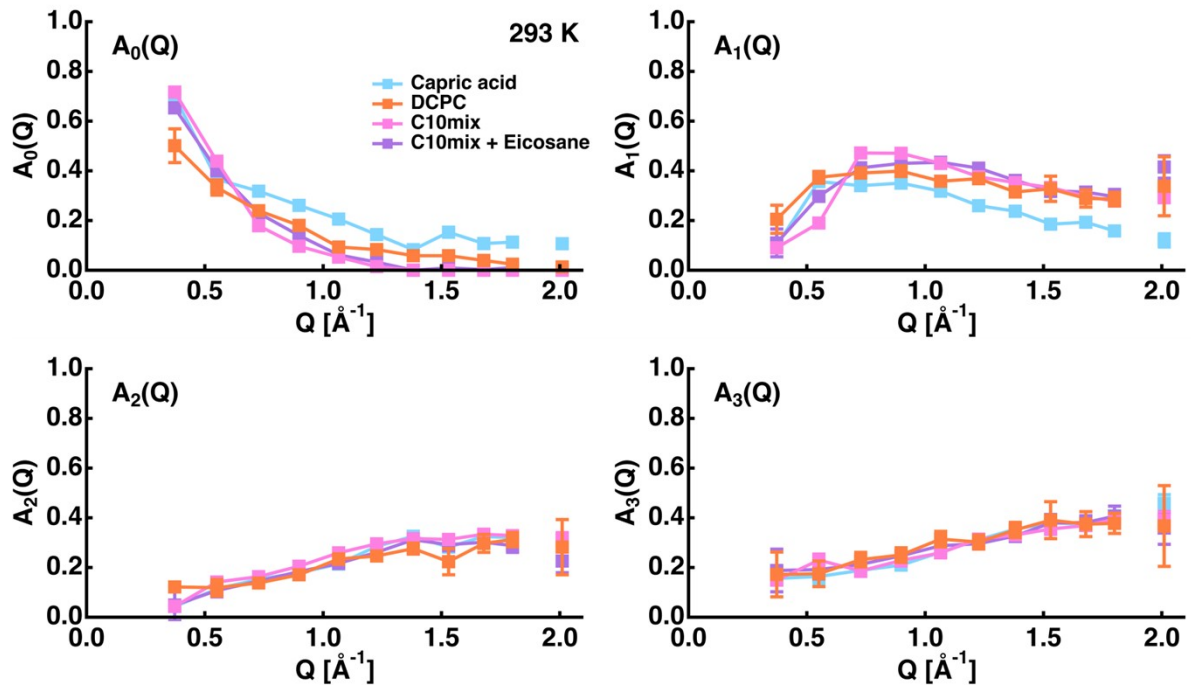

Figure S2: Amplitudes  $A_0$  to  $A_3$  of all samples at 293 K.

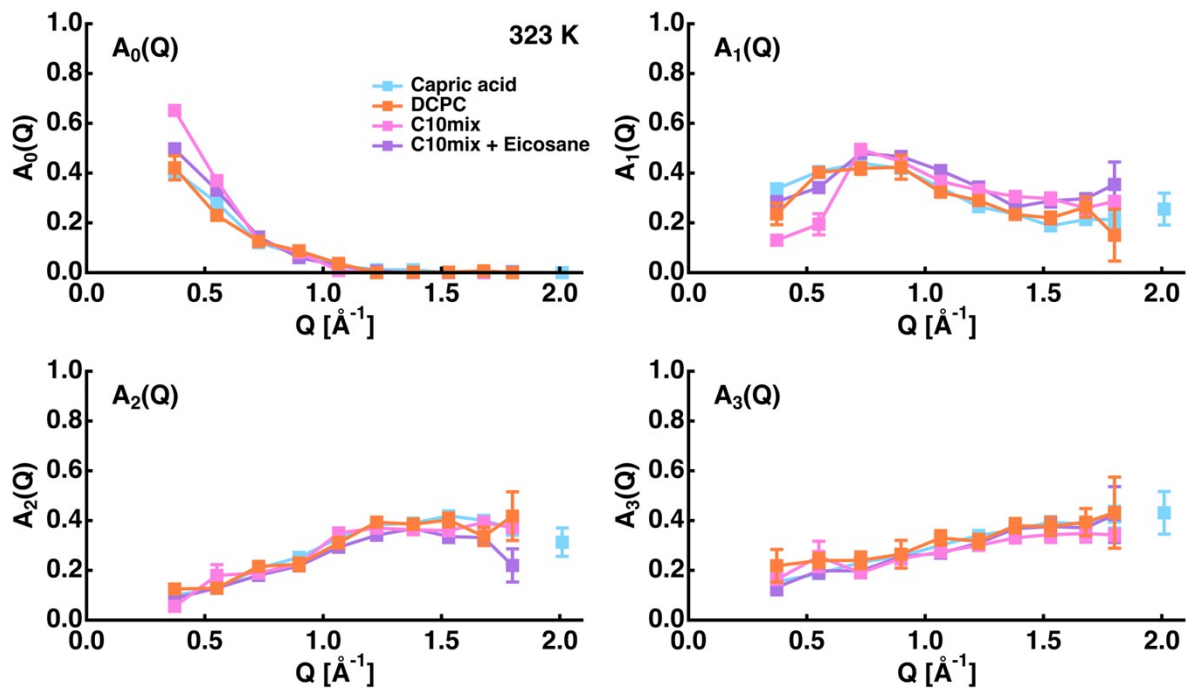

Figure S3: Amplitudes  $A_0$  to  $A_3$  of all samples at 323 K.

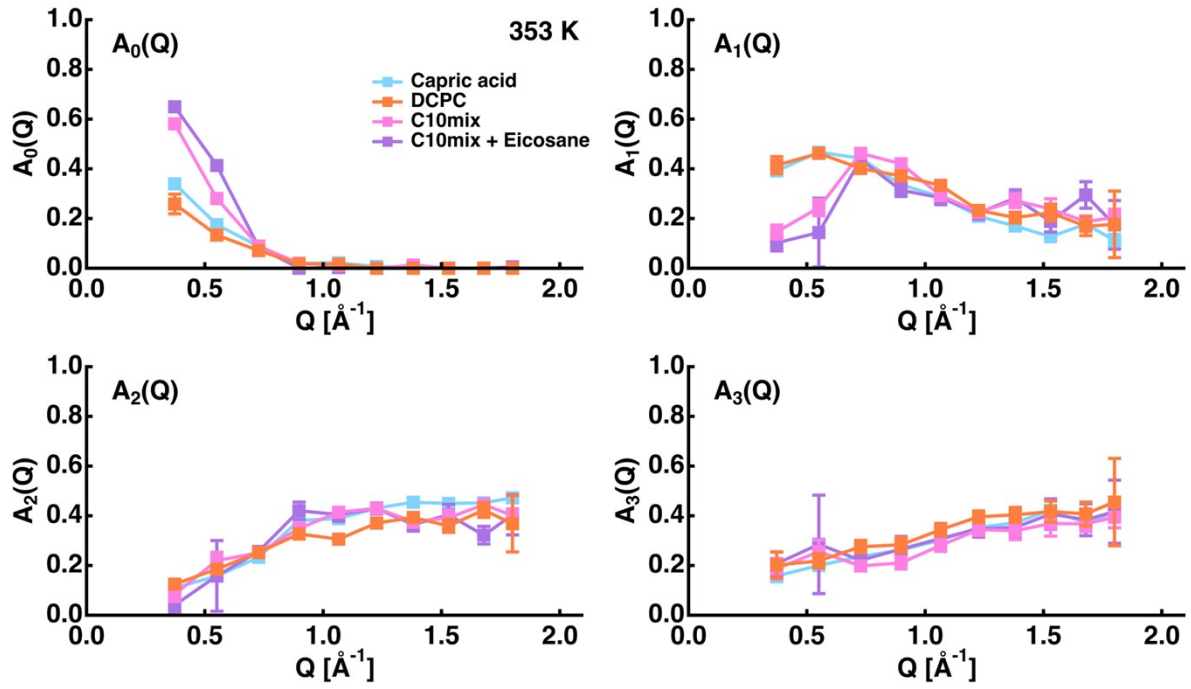

Figure S4: Amplitudes  $A_0$  to  $A_3$  of all samples at 353 K.

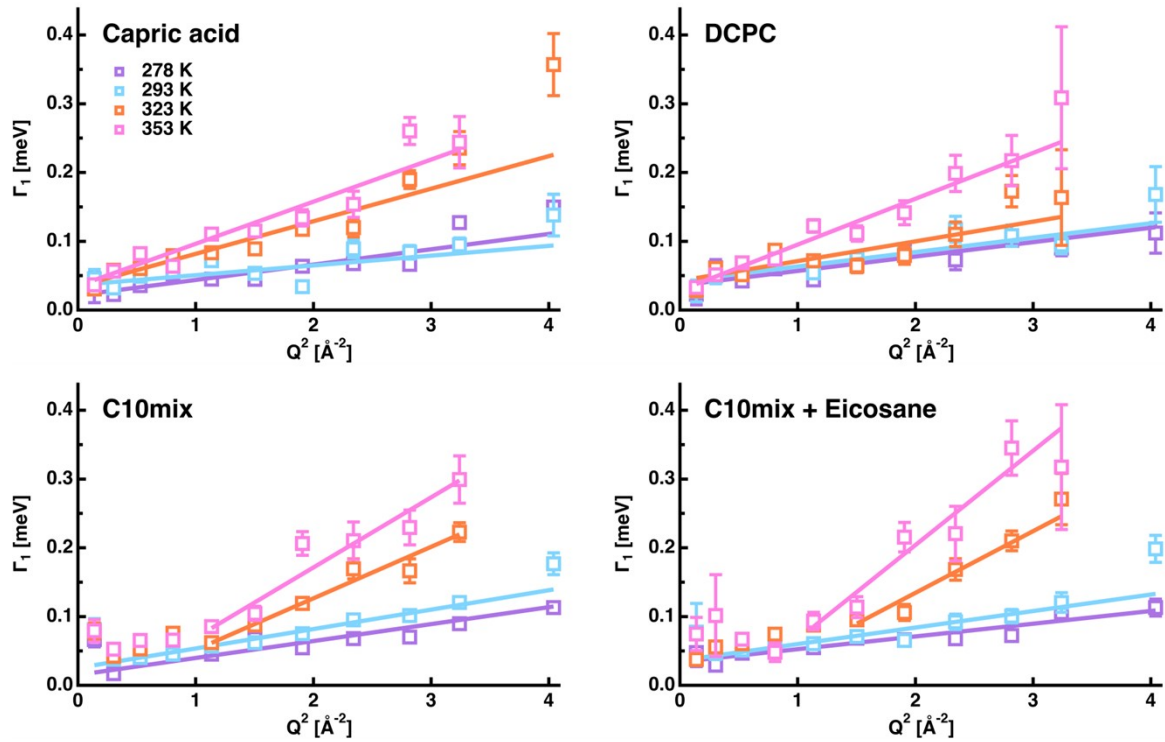

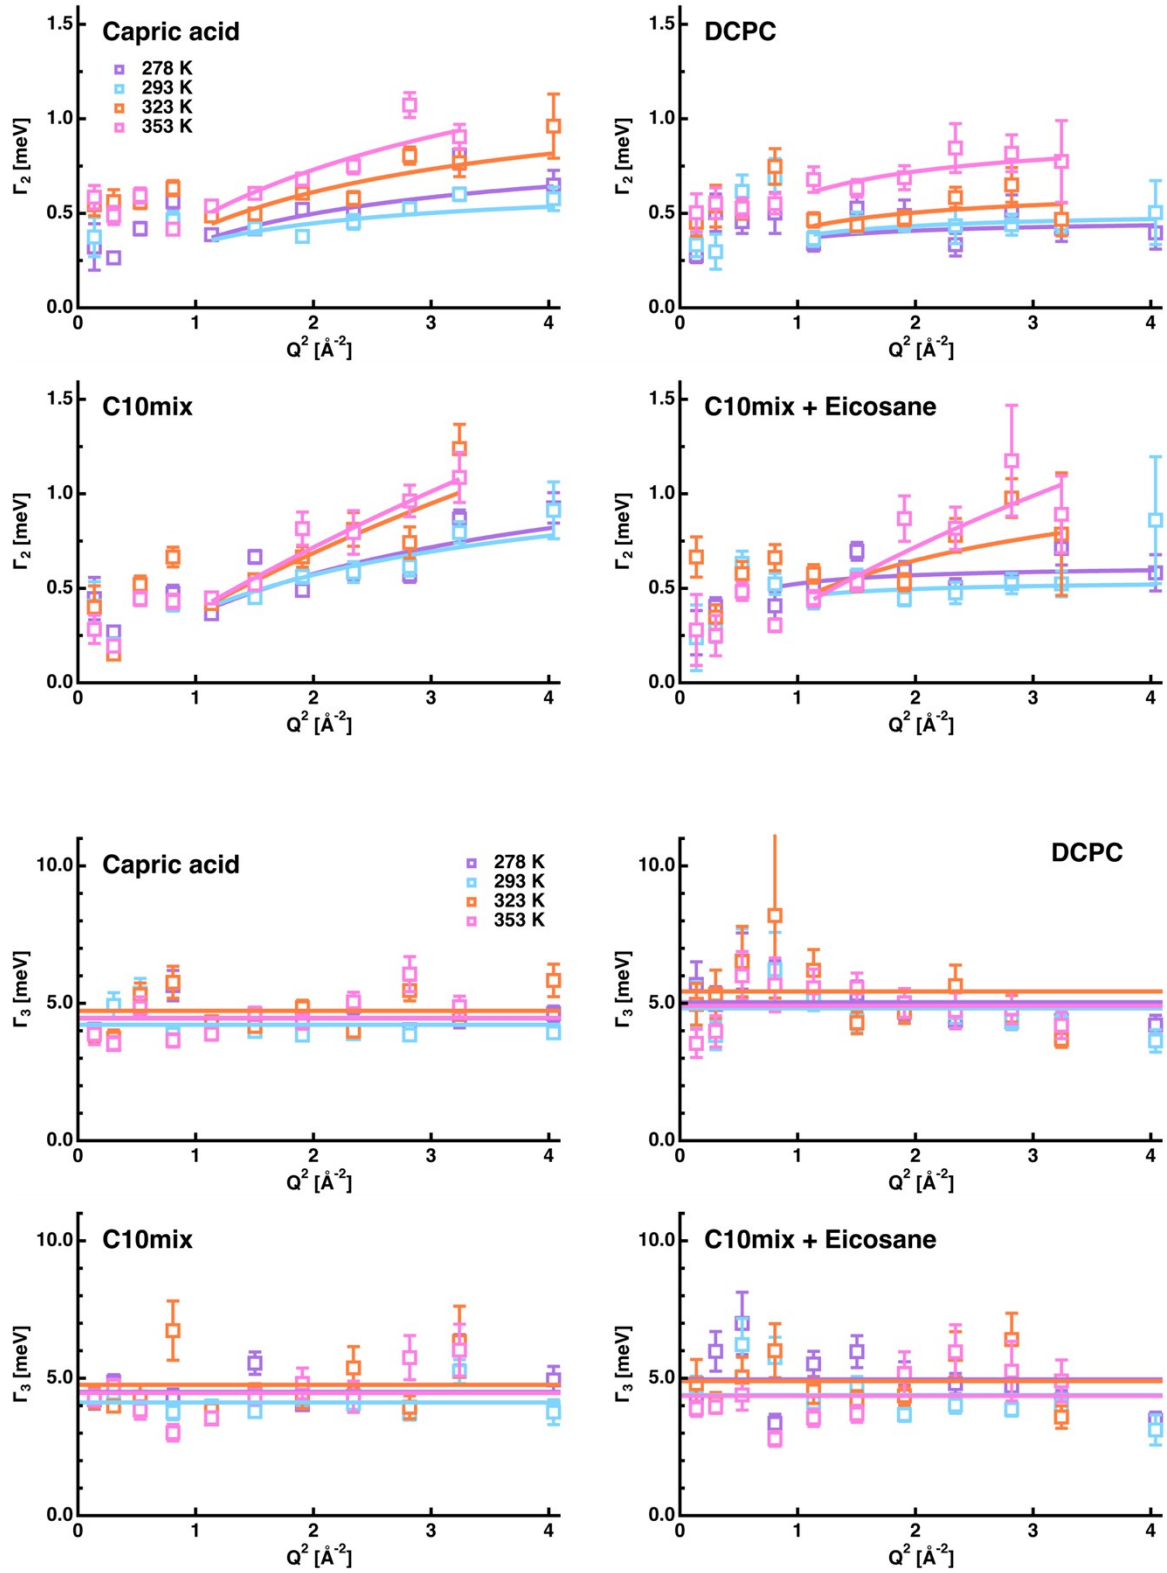

Capric acid:

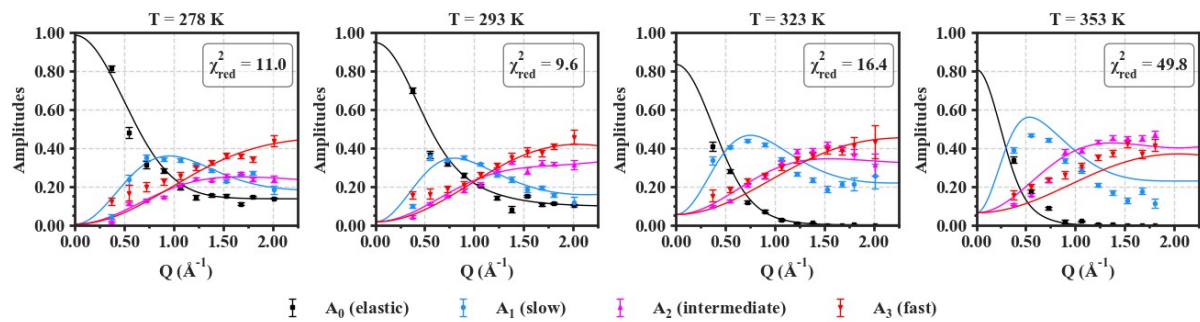

C10 mix:

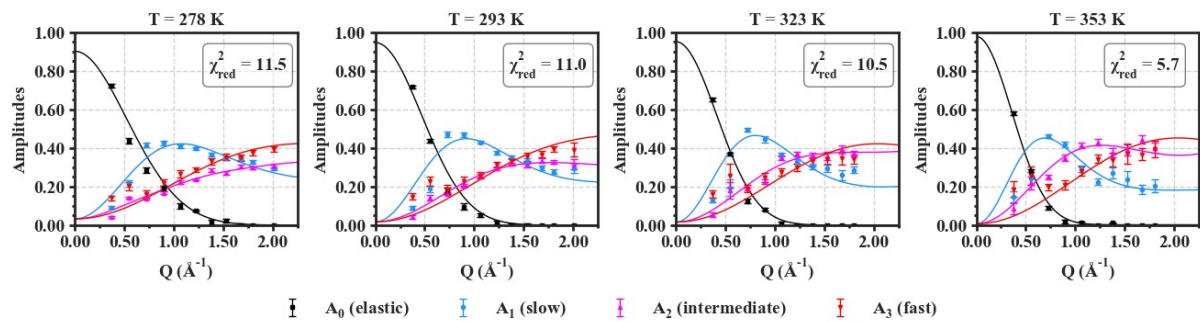

C10 mix + eicosane:

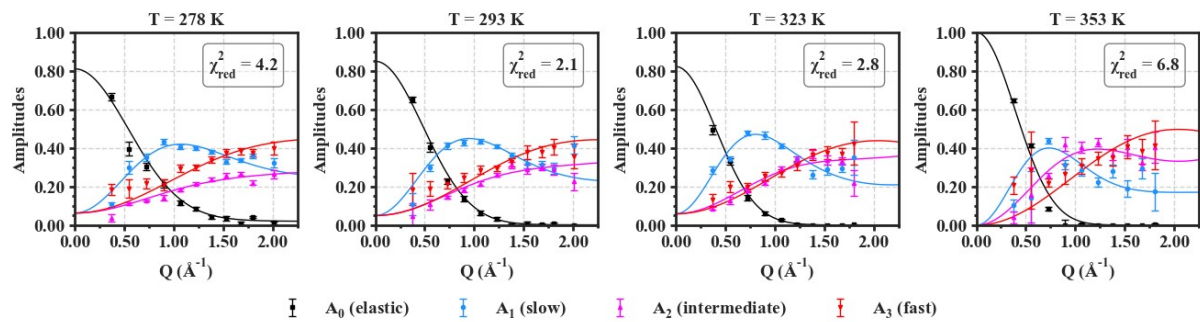

DCPC:

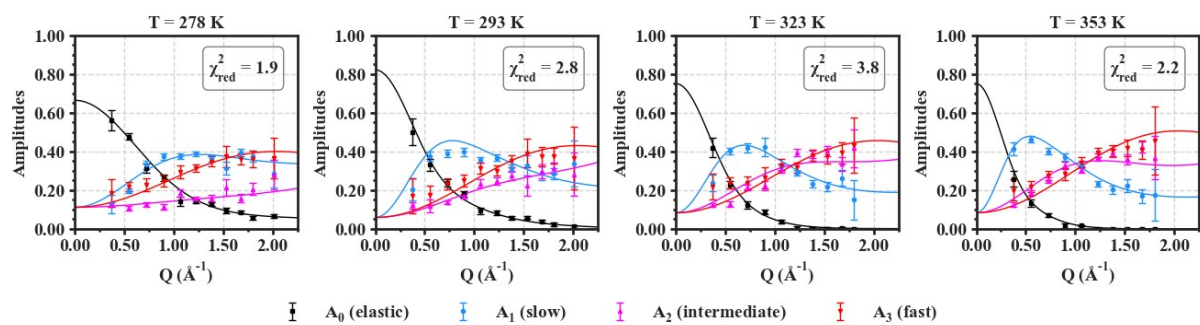

Figure S8: Fits of the amplitudes for all four samples. Error bars are within symbols if not shown.
